# Supplementary material
Source: PubMed Central journal article supplement (PMC5600620)

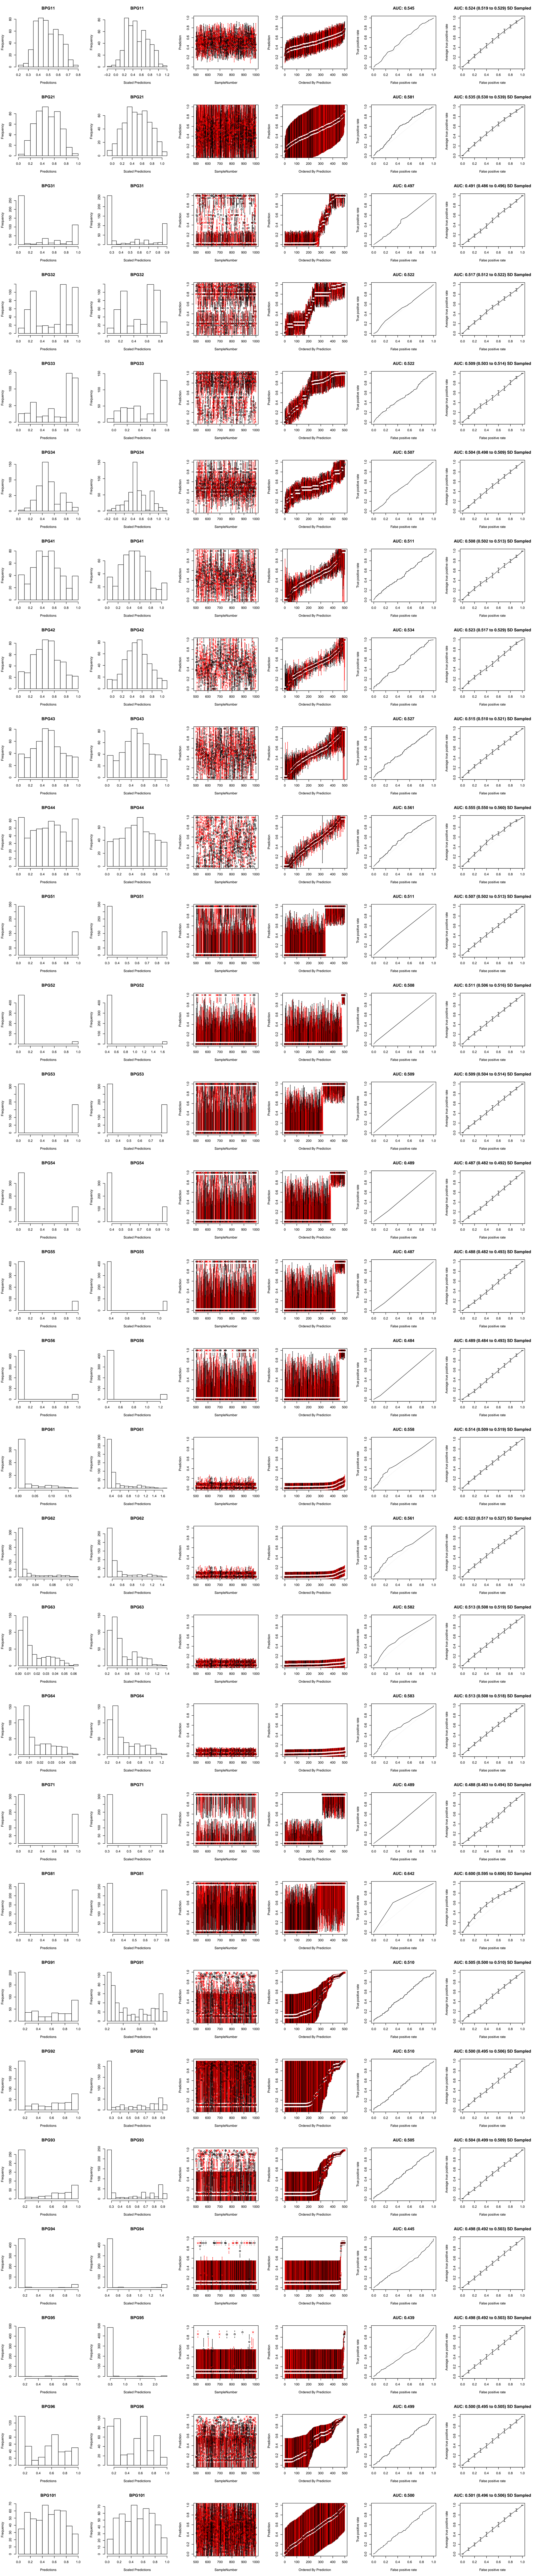

Supplement: NIHMS885554-supplement-Supp_InfoS3.pdf [file NIHMS885554-supplement-Supp_InfoS3.pdf]
